# Supplementary material for: Near-infrared room temperature emission from a novel class of Ru(ii) heteroleptic complexes with quinonoid organometallic linker
Source: Royal Society of Chemistry journal article supplement (doi:10.1039/c3cc41002a), 2013-01-01
Supplement: c3cc41002a.pdf [file c3cc41002a.pdf]

## Supplementary Information

### Near-infrared room temperature emission from a novel class of Ru(II) heteroleptic complexes with quinonoid organometallic linker

Aurélie Damas,<sup>a</sup> Maria Pia Gullo,<sup>b</sup> Marie Noelle Rager,<sup>d</sup> Anny Jutand,<sup>c</sup> Andrea Barbieri,<sup>b</sup>  
and Hani Amouri\*<sup>a</sup>

Electrochemical behavior of the heterodinuclear ruthenium complexes (2-4).

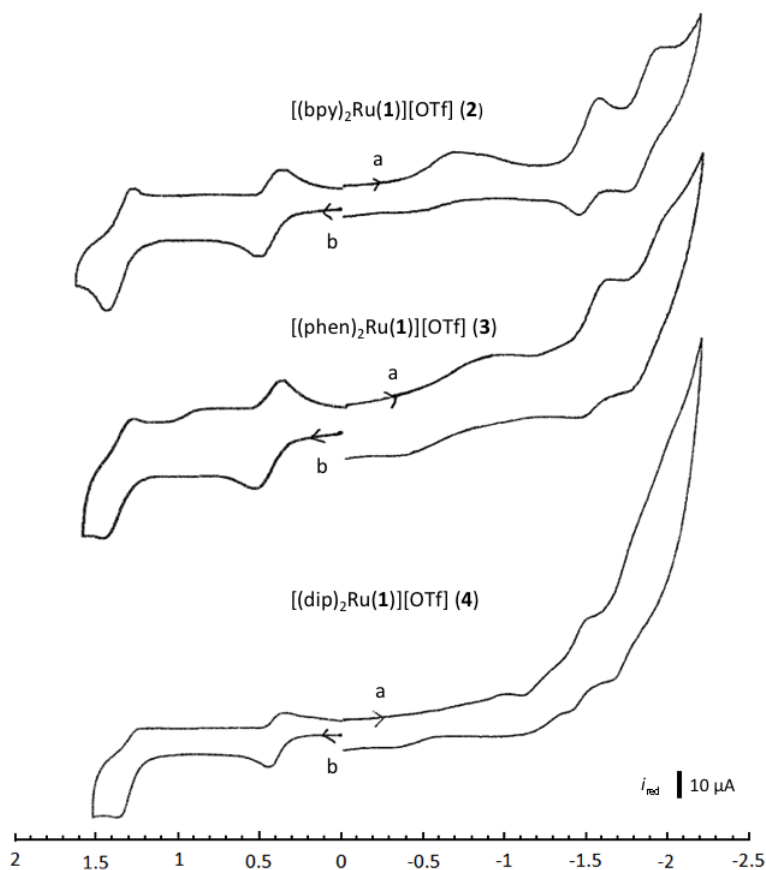

**Figure S1.** Cyclic voltammetry of complexes **2-4** (2 mM) in  $CH_2Cl_2$  containing  $nBu_4NBF_4$  (0.3 M) at gold working electrode ( $d = 0.125$  mm) at scan rate of  $50 V \cdot s^{-1}$  for **2** and **3** and at scan rate of  $20 V \cdot s^{-1}$  for **4**. a) Reduction first. b) Oxidation first. Potentials are referred *versus* SCE (oxidation peak potential of ferrocene =  $+0.507$  V vs SCE).

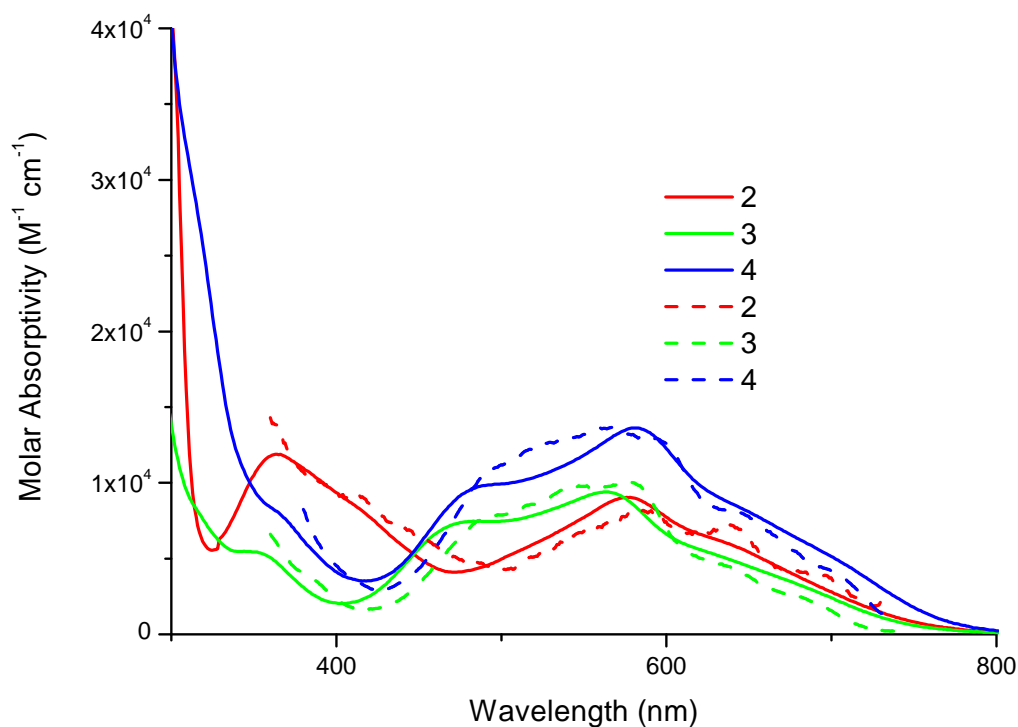

**Figure SI2.** Comparison between absorption (full lines) and excitation (dotted lines) spectra of complexes **2-4** in  $\text{CH}_2\text{Cl}_2$  solution. Excitation spectra are normalised to match the MLCT absorption band.

## Experimental Section

All experimental reactions were carried out at room temperature using standard Schlenk techniques. Solvents were dried and distilled under argon atmosphere by standard procedures prior to use. All reagents obtained from commercial suppliers were used as received. The metallated *o*-quinone  $[\text{Cs}][\text{Cp}^*\text{Ru}(\eta^4\text{-C}_6\text{H}_4\text{O}_2)]$  (**1-Cs**) and the binuclear complex  $[(\text{bpy})_2\text{Ru}(\mathbf{1})][\text{OTf}]$  (**2**), as well as the halogenated precursors  $[(\text{phen})_2\text{RuCl}_2]$  and  $[(\text{dip})_2\text{RuCl}_2]$  were prepared according to literature procedures.<sup>[2c, 4, 13]</sup> Elemental analyses were performed by microanalytical services of ICSN at Gif-sur-Yvette on a Perkin-Elmer 2400 apparatus. All NMR data were acquired on Bruker Avance 400 spectrometer in  $\text{CD}_2\text{Cl}_2$  at 400 MHz for  $^1\text{H}$  NMR and 100 MHz for  $^{13}\text{C}$  NMR. NMR chemical shifts are reported in parts per million referenced to the residual solvent proton ( $\delta = 5.32$  ppm) for  $^1\text{H}$  NMR and carbon ( $\delta = 53.1$  ppm) for  $^{13}\text{C}$  NMR. IR spectra were recorded on a Bruker Tensor 27 equipped with an ATR Harricks apparatus.

**Synthesis of 3.** A colorless acetone solution (5 mL) of AgOTf (103 mg, 0.40 mmol) was added to a dark-purple acetone suspension (5 mL) of [(phen)<sub>2</sub>RuCl<sub>2</sub>] (107 mg, 0.20 mmol). Meanwhile, two equivalents of Cs<sub>2</sub>CO<sub>3</sub> (130 mg, 0.40 mmol) were added at once to an acetone solution (5 mL) of [Cp\*<sub>2</sub>Ru(η<sup>6</sup>-C<sub>6</sub>H<sub>6</sub>O<sub>2</sub>)]<sup>+</sup>[OTf]<sup>-</sup> (100 mg, 0.20 mmol). After 2h of respectively stirring, the AgCl formed in the first Schlenk tube was filtered through celite and the filtered burgundy solution of [(phen)<sub>2</sub>Ru]<sup>2+</sup> was added to the catecholate ruthenium complex suspension [Cs][Cp\*<sub>2</sub>Ru(η<sup>4</sup>-C<sub>6</sub>H<sub>4</sub>O<sub>2</sub>)] (1-Cs) generated *in situ*. The reaction mixture was stirred for an additional hour and the solvent was removed under vacuum. Then the residue was dissolved in CH<sub>2</sub>Cl<sub>2</sub> and filtered through alumina. Evaporation of CH<sub>2</sub>Cl<sub>2</sub> under vacuum provided the bimetallic complex [(phen)<sub>2</sub>Ru(1)]<sup>+</sup>[OTf]<sup>-</sup> (3) as black microcrystals (189 mg, 0.20 mmol). Yield: 99%. Anal. Calcd for C<sub>41</sub>H<sub>35</sub>F<sub>3</sub>N<sub>4</sub>O<sub>5</sub>Ru<sub>2</sub>S.H<sub>2</sub>O (972.96 g.mol<sup>-1</sup>): C, 50.61; H, 3.83; found: C, 50.14; H, 3.87. <sup>1</sup>H NMR (400 MHz, CD<sub>2</sub>Cl<sub>2</sub>): δ = 1.64 (s, 15H, CH<sub>3</sub>-Cp\*); 4.47-4.49 (m, 2H, Hγ,δ); 4.81 (dd, 1H, J = 4.3, 2.3 Hz, Hε); 5.04 (dd, 1H, J = 4.3, 2.3 Hz, Hβ); 7.23 (dd, 1H, J = 8.1, 5.4 Hz, H8'); 7.30 (dd, 1H, J = 8.1, 5.4 Hz, H8); 7.64 (dd, 1H, J = 5.4, 1.1 Hz, H9'); 7.87-7.89 (m, 1H, H9); 7.90 (dd, 1H, J = 8.1, 5.3 Hz, H3'); 7.96 (d, 1H, J = 8.8 Hz, H6'); 8.02 (dd, 1H, J = 8.2, 1.1 Hz, H7'); 8.05 (d, 1H, J = 8.8 Hz, H6); 8.07 (d, 1H, J = 8.8 Hz, H5'); 8.12 (dd, 1H, J = 8.1, 1.1 Hz, H7); 8.15-8.19 (m, 2H, H3,5); 8.42 (dd, 1H, J = 8.2, 1.2 Hz, H4'); 8.57 (dd, 1H, J = 8.2, 1.2 Hz, H4); 9.37 (dd, 1H, J = 5.3, 1.2 Hz, H2'); 9.76 (dd, 1H, J = 5.1, 1.2 Hz, H2). <sup>13</sup>C{<sup>1</sup>H} NMR (100 MHz, CD<sub>2</sub>Cl<sub>2</sub>): δ = 10.0 (CH<sub>3</sub>-Cp\*); 75.0 (Cε); 76.1 (Cδ); 76.5 (Cγ); 77.4 (Cβ); 89.3 (Cq-Cp\*); 123.4 (C8'); 123.8 (C8); 124.2 (C3'); 124.8 (C3); 127.1 (C6'); 127.2 (C6,5'); 127.3 (C5); 129.8 (C4a,4a'); 130.0 (C6a); 130.2 (C6a'); 131.5 (C7'); 132.1 (C7); 133.2 (C4); 133.4 (C4'); 142.5 (Cα); 147.9 (Cζ); 148.7 (C1a'); 149.1 (C1a); 151.0 (C10a,10a'); 151.2 (C2'); 151.6 (C2); 152.5 (C9'); 153.2 (C9). IR (ATR, cm<sup>-1</sup>): ν = 3380; 3054; 2906; 1628; 1567; 1504; 1463; 1445; 1425; 1407; 1383; 1353; 1256; 1221; 1195; 1139; 1093; 1071; 1052; 1027; 912; 868; 837; 768; 731; 716; 634; 603; 572; 557; 538; 515; 455; 407; 384; 346; 327; 309; 291; 275; 246; 211.

**Synthesis of 4.** This compound was prepared in the dark according to the procedure described for complex 3 using the following amounts: AgOTf (51.4 mg, 0.20 mmol), [(dip)<sub>2</sub>RuCl<sub>2</sub>] (83.7 mg, 0.10 mmol) instead of [(phen)<sub>2</sub>RuCl<sub>2</sub>], Cs<sub>2</sub>CO<sub>3</sub> (65.2 mg, 0.20 mmol) and [Cp\*<sub>2</sub>Ru(η<sup>6</sup>-C<sub>6</sub>H<sub>6</sub>O<sub>2</sub>)]<sup>+</sup>[OTf]<sup>-</sup> (49.5 mg, 0.10 mmol). Evaporation of acetone immediately provided the bimetallic complex [(dip)<sub>2</sub>Ru(1)]<sup>+</sup>[OTf]<sup>-</sup> (4) as a black microcrystalline solid (121 mg, 86.0 μmol). Yield: 86%. Anal. Calcd for C<sub>65</sub>H<sub>51</sub>F<sub>3</sub>N<sub>4</sub>O<sub>5</sub>Ru<sub>2</sub>S.4(CH<sub>3</sub>)<sub>2</sub>CO (1491.64 g.mol<sup>-1</sup>): C, 62.00; H, 5.07; found: C, 62.13; H, 5.21. <sup>1</sup>H NMR (400 MHz, CD<sub>2</sub>Cl<sub>2</sub>): δ = 1.69 (s,

15H, CH<sub>3</sub>-Cp\*); 4.50-4.55 (m, 2H, H<sub>γ</sub>,δ); 4.88-4.90 (m, 1H, H<sub>ε</sub>); 5.09-5.11 (m, 1H, H<sub>β</sub>); 7.32-8.22 (m, 30H, H<sub>3,9,8,6,5,3',9',8',6',5',Phenyl</sub>); 9.46 (d, 1H, *J* = 5.5 Hz, H<sub>2'</sub>); 9.85 (d, 1H, *J* = 5.3 Hz, H<sub>2</sub>). IR (ATR, cm<sup>-1</sup>):  $\bar{\nu}$  = 3441; 3056; 2968; 2909; 1697; 1621; 1600; 1547; 1507; 1463; 1444; 1413; 1353; 1254; 1221; 1144; 1080; 1028; 911; 884; 845; 764; 734; 700; 669; 635; 605; 572; 515; 451; 400; 349; 323; 236; 215.

**General procedures for cyclic voltammetry.** Cyclic voltammetry was performed in a three-electrode cell connected to a vacuum line, at room temperature. The counter electrode was a platinum wire of ca. 1 cm<sup>2</sup> apparent surface area. The reference was a saturated calomel electrode (Radiometer Analytical) separated from the solution by a bridge filled with 3 mL of CH<sub>2</sub>Cl<sub>2</sub> containing *n*Bu<sub>4</sub>NBF<sub>4</sub> (0.3 M). The working electrode was a stationary gold disk (0.5 mm diameter for scan rates from 0.1 to 10 V.s<sup>-1</sup> and 0.125 mm diameter for scan rates from 20 to 50 V.s<sup>-1</sup>). The cyclic voltammetry of complexes **2**, **3** and **4** in 15 mL of CH<sub>2</sub>Cl<sub>2</sub> (2 mM) containing *n*Bu<sub>4</sub>NBF<sub>4</sub> (0.3 M) was performed at various scan rates.

**Optical Spectroscopy.** All solvents used for photophysical studies were spectroscopic grade (C. Erba). 1 cm path length square optical Suprasil Quartz (QS) cuvettes were used for measurements at room temperature of dilute solutions. The absorption spectra of dilute solutions were obtained by using a Perkin–Elmer Lambda 950 UV/VIS/NIR spectrophotometer. Molar absorptivity values ( $\epsilon$ ) were calculated by applying the Lambert-Beer law to low absorbance spectra (*A* < 1) recorded at successive dilutions. Steady-state photoluminescence spectra were measured in right-angle mode by using an Edinburgh FLS920 fluorometer, equipped with a Peltier-cooled Hamamatsu R928 (200-900 nm) and a supercooled Hamamatsu R5509-72 (600-1,800 nm) PMTs. Luminescence quantum efficiencies in solution were evaluated by comparing the wavelength integrated intensities with reference to [Ru(bpy)<sub>3</sub>]Cl<sub>2</sub> ( $\phi = 0.040$  in air-equilibrated water, from *Coord. Chem. Rev.* **2010**, *254*, 2449). Luminescence lifetimes were measured with an IBH 5000F TCSPC apparatus, by using pulsed NanoLED excitation sources at  $\lambda_{exc} = 465$  nm. Band maxima, relative luminescence intensities and lifetimes were obtained with uncertainty of 2 nm, 20% and 10%, respectively.
